# Supplementary material for: Psychometric Assessment of the Chinese Version of the Scale Perception and Understanding of Human Dignity in Nursing: Cross-sectional Translation
Source: Research Square preprint supplement (doi:10.21203/rs.3.rs-8077689/v1), 2025-12-01
Supplement: Supplementary file 1 [file 9460f793bc55407797583e5a.docx]

**Table S1:** Results of Expert Consultation

| Expert | Theoretical Knowledge | Practical Experience | Reference to Domestic and International Materials | Personal Intuition | Familiarity Level | Ca | Cs | Cr | Kendall's Coefficient of Agreement |
| --- | --- | --- | --- | --- | --- | --- | --- | --- | --- |
| 1 | 0.3 | 0.5 | 0.1 | 0.1 | 1.0 | 0.93 | 0.83 | 0.88 | 0.61 |
| 2 | 0.2 | 0.5 | 0.1 | 0.1 | 0.5 |
| 3 | 0.3 | 0.3 | 0.1 | 0.1 | 0.2 |
| 4 | 0.3 | 0.5 | 0.1 | 0.1 | 0.8 |
| 5 | 0.1 | 0.5 | 0.1 | 0.1 | 1.0 |
| 6 | 0.3 | 0.5 | 0.1 | 0.1 | 1.0 |
| 7 | 0.3 | 0.5 | 0.1 | 0.1 | 0.8 |
| 8 | 0.3 | 0.5 | 0.1 | 0.1 | 1.0 |
| 9 | 0.2 | 0.4 | 0.1 | 0.1 | 1.0 |
| 10 | 0.3 | 0.5 | 0.1 | 0.1 | 1.0 |

| **Table S2** Content Validity | | | | | | |
| --- | --- | --- | --- | --- | --- | --- |
| Item | Standard Deviation | Minimum | Maximum | Coefficient of Variation | I-CVI | S-CVI/Ave |
| A1 | 0.000 | 4.000 | 4.000 | 0.400 | 1.000 | 1.000 |
| A2 | 0.000 | 4.000 | 4.000 | 0.400 |
| A3 | 0.000 | 4.000 | 4.000 | 0.400 |
| A4 | 0.000 | 4.000 | 4.000 | 0.400 |
| A5 | 0.000 | 4.000 | 4.000 | 0.400 |
| A6 | 0.000 | 4.000 | 4.000 | 0.400 |
| A7 | 0.527 | 3.000 | 4.000 | 0.350 |
| A8 | 0.000 | 4.000 | 4.000 | 0.400 |
| A9 | 0.000 | 4.000 | 4.000 | 0.400 |
| A10 | 0.000 | 4.000 | 4.000 | 0.400 |
| A11 | 0.000 | 4.000 | 4.000 | 0.400 |
| A12 | 0.000 | 4.000 | 4.000 | 0.400 |
| A13 | 0.422 | 3.000 | 4.000 | 0.320 |
| A14 | 0.000 | 4.000 | 4.000 | 0.400 |
| A15 | 0.000 | 4.000 | 4.000 | 0.400 |
| A16 | 0.000 | 4.000 | 4.000 | 0.400 |
| A17 | 0.000 | 4.000 | 4.000 | 0.400 |
| A18 | 0.516 | 3.000 | 4.000 | 0.360 |
| A19 | 0.000 | 4.000 | 4.000 | 0.400 |
| A20 | 0.483 | 3.000 | 4.000 | 0.330 |
| A21 | 0.000 | 4.000 | 4.000 | 0.400 |
| A22 | 0.000 | 4.000 | 4.000 | 0.400 |
| A23 | 0.000 | 4.000 | 4.000 | 0.400 |
| A24 | 0.000 | 4.000 | 4.000 | 0.400 |
| A25 | 0.000 | 4.000 | 4.000 | 0.400 |
| A26 | 0.000 | 4.000 | 4.000 | 0.400 |
| A27 | 0.000 | 4.000 | 4.000 | 0.400 |
| A28 | 0.000 | 4.000 | 4.000 | 0.400 |
| A29 | 0.000 | 4.000 | 4.000 | 0.400 |
| A30 | 0.000 | 4.000 | 4.000 | 0.400 |
| A31 | 0.000 | 4.000 | 4.000 | 0.400 |
| A32 | 0.000 | 4.000 | 4.000 | 0.400 |
| A33 | 0.000 | 4.000 | 4.000 | 0.400 |
| A34 | 0.000 | 4.000 | 4.000 | 0.400 |
| A35 | 0.000 | 4.000 | 4.000 | 0.400 |
| A36 | 0.000 | 4.000 | 4.000 | 0.400 |
| A37 | 0.000 | 4.000 | 4.000 | 0.400 |
| A38 | 0.000 | 4.000 | 4.000 | 0.400 |
| A39 | 0.000 | 4.000 | 4.000 | 0.400 |
| A40 | 0.000 | 4.000 | 4.000 | 0.400 |
| A41 | 0.000 | 4.000 | 4.000 | 0.400 |
| A42 | 0.000 | 4.000 | 4.000 | 0.400 |
| A43 | 0.516 | 3.000 | 4.000 | 0.340 |

| **Table S3** KMO and Bartlett's Test | | |
| --- | --- | --- |
| KMO Sampling Adequacy Measure |  | 0.919 |
| Bartlett's Sphericity Test | Approximate chi-square | 17698.66 |
|  | degree of freedom | 903 |
|  | P | 0.000 |

**Table S4**Split-Half Reliability

| Klonbach Alpha | | | | Spearman-Brown coefficient | |
| --- | --- | --- | --- | --- | --- |
| Part I (22 Questions) | | Part II (21 Questions) | |
| 0.924 |  | 0.943 |  | 0.836 |  |
